# Supplementary material for: The Futility of Nugent Scoring as a Diagnostic Tool for Neovaginal Bacterial Dysbiosis in Transfeminine People
Source: Research Square preprint supplement (doi:10.21203/rs.3.rs-7428168/v1), 2025-09-08
Supplement: Supplementary file 1 [file 15d598b904d3b31ff03cc839.xlsx]

## Sheet: Sheet1
ID	Average Nugent Score
P001	5.6
P002	6.7
P003	8.3
P004	6.4
P005	7.4
P006	6.1
P007	7.1
P008	7
P009	5.1
P010	1.8
P011	6.6
P012	6.9
P013	6.3
P014	3.9
P015	7.6
P016	8.5
P017	7.8
P018	7.6
P019	7.1
P020	6.9
P021	7.6
P022	9.8
P023	3.1
P024	7.1
P025	7.8
P026	7.7
P027	5.3
P028	7.4
P029	7.5
P030	6.6
P031	6.5
P032	6.8
P033	7.2
P034	6.9
P035	6.8
P036	6.5
P037	6.3
P038	3.8
P039	7.3
	Participant identifiers have been anonymized and replaced with sequential pseudonymized IDs (e.g., P001, P002). No identifying information is included.
	Average Nugent score for each participant was determined by calculating the mean score across 10 representative FOVs from each smear
