# Supplementary material for: The Futility of Nugent Scoring as a Diagnostic Tool for Neovaginal Bacterial Dysbiosis in Transfeminine People
Source: Research Square preprint supplement (doi:10.21203/rs.3.rs-7428168/v1), 2025-09-08
Supplement: Supplementary file 2 [file c0be6490f9804780af1c5456.xlsx]

## Sheet: Sheet 1
ID	Acinetobacter	Actinobaculum	Actinomyces	Actinotignum	Aerococcus	Agathobacter	Alistipes	Allisonella	Allofustis	Alloiococcus	Alloprevotella	Alloscardovia	Anaerobutyricum	Anaerococcus	Anaeroglobus	Anaerostipes	Aquabacterium	Arcanobacterium	Atopobium	Bacteroides	Barnesiella	Bergeyella	Berryella	Bifidobacterium	Bilophila	Blautia	Blvii28_wastewater-sludge_group	Brachybacterium	Bradyrhizobium	Brevibacterium	Bulleidia	Butyrivibrio	Campylobacter	Candidatus_Saccharimonas	Catenibacterium	Catonella	Centipeda	Christensenellaceae_R-7_group	Cloacibacillus	Clostridia_UCG-014	Clostridioides	Clostridium	Clostridium_innocuum_group	Colidextribacter	Collinsella	Corynebacterium	Criibacterium	Cryptobacterium	Cupriavidus
P001	0	0	0	0.0231757	0	0	0	0	0	0	0	0	0	0.0530614	0	0	0	0.0121397	0.0213217	0	0	0	0	0	0	0	0	0	0	0	0	0	0.0290028	0	0	0	0	0	0	0	0	0	0	0	0	0.0776939	0	0	0
P002	0	0	0.000480846	0.0014746	0.00711653	0	0	0	0	0	0	0	0	0.0498477	0	0	0	0.00246834	0.00891168	9.61693e-05	0	0	0.0037506	0	0	0	0	0	0	0	0	0	0.00852701	0	0	0	0	0	0	0.00416733	0	0	0	0	0	0.0017631	0.000352621	0	0
P003	0	0	0	0.0502555	0.000220226	0	0	0	0	0	0	0	0	0.0147551	0	0	0	0.00493305	0.00242248	0	0	0	0	0	0	0	0	0	0	0	0	0	0.135263	0	0	0	0	0.000220226	0	0.0118922	0	0	0	0	0	0.000220226	0	0	0
P004	0	0	0	0	0.00122587	0	0	0	0	0	0	0	0	0.00298805	0	0	0	0.00022985	0.00191542	0	0	0	0.000383083	0	0	0	0	0	0	0	0	0	0.018388	0	0	0	0	0	0	0.000612933	0	0	0	0	0	0	0	0	0
P005	0	0	0	0.000367088	0.000314647	0	0	0	0	0	0	0	0	0.00319891	0.00765641	0	0	0.000104882	0.000786617	0	0	0	0	0	0	0	0	0	0	0	0.00309403	0	0.0597829	0	0	0	0	0	0	0	0	0	0	0	0	0	0	0	0
P006	0	0	0	0	0	0	0	0	0	0	0	0	0	0.00674745	0	0	0	0.00123933	0.0178555	0	0	0	0	0	0	0	0	0	0	0	0	0	0.0350225	0	0	0	0	0	0	0	0	0	0	0	0	0	0	0	0
P007	0	0	0	0	0	0	0	0	0	0	0	0	0	0	0.00738512	0	0	0	0.00150438	0	0	0	0	0	0	0	0	0	0	0	0	0	0.0536105	0	0	0	0	0.00519694	0	0	0	0	0	0	0	0	0.00218818	0	0
P008	0	0	0	0.000438388	0	0	0	0	0	0	0	0.000292259	0	0.0820882	0.000146129	0	0	0.000657582	0.0217733	0	0	0	0.00105944	0	0	0	0	0	0	0	0.000219194	0	0.0199467	0.000109597	0	0	0	0	0	0.00215541	0	0	0	0	0	0.0202755	0	0	0
P009	0	0	0	0.0270578	0	0	0	0	0	0	0	0	0	0.088376	0	0	0	0.000194661	0.0190211	0	0	0	0.00581201	0.0102058	0	0	0	0	0	0	0	0	0.00208565	0	0	0	0	0	0	0	0	0	0	0	0	0.00923248	0	0	0
P010	0	0	0	0	0	0	0	0.00018356	0	0	0	0.000991226	0	0.00135835	0.0381071	0	0	0	0	0	0	0	0	0.0226881	0	0	0	0	0	0	0	0	0.000807665	0	0	0	0	0	0	0	0	0	0	0	0	0.000146848	0	0	0
P011	0	0	0	0.00631933	0	0	0	0	0	0	0	0	0	0.0421747	0	0	0	0.000171721	0.0146993	0	0	0	0.00298795	0.00288491	0	0	0	0	0	0	0	0	0.00394958	0	0	0	0	0	0	0	0	0	0	0	0	0.00243844	0	0	0
P012	0	0	0	0.00080935	0.0072194	0	0	0	0	0	0	0	0	0.0357409	0	0	0	0.00932371	0.0262553	0	0	0	0	0	0	0	0	0	0	0	0	0	0.00615106	0	0	0	0.000258992	0	0	0	0	0	0	0	0	0.00139208	0	0	0
P013	0	0.000147973	0	0.0258212	0	0	0	0	0	0	0	0	0	0.0337378	0	0	0	0.0116159	0.0148713	0	0	0	0	0	0	0	0	0	0	0	0	0	0.0135025	0	0	0	0	0	0	0	0	0	0	0	0	0.0769458	0	0	0
P014	0	0	0	0	0	0	0	0	0	0	0	0	0	0.200292	0	0	0	0	0.00822855	0	0	0	0	0	0	0	0	0	0	0	0	0	0.00861307	0	0	0	0	0	0	0	0	0	0	0	0	0.0445649	0	0	0
P015	0	0.002282	0	0	0	0	0	0	0	0	0	0	0	0.184745	0	0	0	0.00077685	0	0.00927365	0	0	0	0	0	0	0	0	0	0	0	0	0.012381	0	0	0	0	0	0	0	0	0	0	0	0	0.0177219	0	0	0
P016	0	0	0	0.000337284	0	0	0	0	0	0	0	0.00014455	0	0.0307892	0	0	0	0.00187916	0.0204298	0	0	0	0	0	0.000530018	0	0.00756481	0	0	0	0	0	0.0250072	0	0	0	0	0	0	0	0	0	0	0	0	0	0	0	0
P017	0	0	0	0.00657096	0.00657096	0	0	0	0	0	0	0	0	0.0454361	0.000342562	0	0	0.00470244	0.00062284	0	0	0	0.00015571	0	0	0	0	0	0	0	0	0	0.0719068	0	0	0	0	0	0	0	0	0	0	0	0	0	0.000217994	0	0
P018	0	0	0	0.0408608	0.0109954	0	0	0	0	0	0	0	0	0.063541	0.000290307	0	0	0.00547955	0.00428203	0	0	0	0.000471749	0.00224988	0	0	0	0	0	0	0	0	0.0203215	0	0	0	0	0.000471749	0	0	0	0	0	0	0	0	0.000217731	0	0
P019	0	0	0	0.000297265	0.00338882	0	0	0	0	0	0	0	0	0.0352854	0	0	0	0.0123068	0.00677765	0	0	0	8.91795e-05	0	0	0	0.000713436	0	0	0	0	0	0.0453627	0	0	0	0	8.91795e-05	0	0	0	0	0	0	0	0.0263674	0	0	0
P020	0	0	0	0.0945206	0	0	0	0	0	0	0	0.0168555	0	0.00493198	0	0	0	0.00552816	0	0	0	0	0	0.0249851	0	0	0	0	0	0	0	0	0	0	0	0	0	0	0	0	0	0	0	0	0	0.164219	0	0	0
P021	0	0	0	0.00712129	0	0	0	0	0	0	0	0.00464432	0	0.0101788	0.0157133	0	0	0.000309621	0.0130428	0	0	0	0	0.00197384	0	0	0	0	0	0	0	0	0.0168744	0	0	0	0	0	0	0	0	0	0	0	0	0	0.000967567	0	0
P022	0	0	0	0.0124778	0	0	0	0	0	0	0	0.000629443	0	0.0303984	0	0	0	0.00403584	0	0	0	0	0	0	0	0	0	0	0	0	0	0	0.0725711	0	0	0	0.00410989	0	0	0	0	0	0	0	0	0.000666469	0	0	0
P023	0	0	0	0	0	0	0	0	0	0	0	0.0477301	0	0.116147	0	0	0	0.000714635	0	0	0	0.000150449	0	0	0	0	0	0	0	0.00500244	0	0	0.00620604	0	0	0	0	0	0	0.000451348	0	0	0	0	0	0.0771806	0	0	0
P024	0	0	0	0.00136348	0.000681741	0	0	0	0	0	0	0	0	0.00352233	0	0	0	0.00443131	0.00136348	0	0	0	0	0	0	0	0	0	0	0	0	0	0.0188047	0	0	0	0	0.000852176	0	0	0	0	0	0	0	0.000227247	0	0	0
P025	0	0	0	0	0	0	0	0	0	0	0	0	0	0.0863536	0.0483242	0	0	0	0	0	0	0	0	0.00361961	0	0	0	0	0	0	0	0	0.00874348	0	0	0	0	0	0	0	0	0	0	0	0	0	0	0	0
P026	0	0	0	0.0389574	0	0.000388514	0	0	7.06389e-05	0.000353195	0	0	0.000247236	0.026313	0	0	0	0.00558048	0.00194257	0.00102426	0	0	0	0.000176597	0	0.000600431	0	0	0	0.00067107	0	0	0.0369088	0	0	0	0	0.000565111	0	0.000423834	0	0.000176597	0	0	0.000600431	0.0116554	0.000282556	0	0
P027	0	0	0	0	0	0	0	0	0	0	0	0	0	0.0650383	0	0	0	0	0	0	0	0	0	0	0	0	0	0	0	0	0	0	0.00855516	0	0	0	0	0	0	0	0	0	0	0	0	0.000381643	0	0	0
P028	0	0	0	0.0118534	0.00137491	0	0	0	0	0	0	0	0	0.0109993	0.00010416	0	0	0	8.33281e-05	0	0	0	0	0.0069579	0	0	0	0	0	0	0	0	0.00572881	0	0	0	0	0	0	0	0	0	4.16641e-05	0	0	0.00020832	0	4.16641e-05	0
P029	0	0	0	0	0.00916166	0	0	0	0	0	0	0	0	0.000622637	0	0	0	0	0.0142317	0	0	0	0	0.000489215	0.00662664	0	0	0	0	0	0	0	0.00366911	0	0	0	0	0	0	0	0	0	0	0	0	0.00569268	0	0	0
P030	0	0	0	0.000231241	0	0	0	0	0	0	0	0	0	0.00832466	0	0	0	0	0.0111574	0	0	0	0.00263036	0.000289051	0	0	0	0	0	0	0	0	0.0217944	0	0	0	0	0	0	0	0	0	0	0	0	0	0	0	0
P031	0	0	0	0	0	0	0	0	0	0	0	0	0	0.0148148	0.00529101	0	0	0	0.00687831	0	0	0	0	0	0	0	0	0	0	0	0	0	0.0031746	0	0	0	0	0.00899471	0	0	0	0	0	0	0	0	0.00634921	0	0
P032	0	0	0	0	0	0	0	0	0	0	0	0	0	0.0326223	0	0	0	0.00773735	0	0	0	0	0	0	0	0	0	0	0	0	0	0	0.00711	0	0	0	0	0.00669176	0	0.00250941	0	0	0	0	0	0	0.00188206	0	0
P033	0	0	0	0	0	0	0	0	0	0	0	0	0	0.03	0.00642857	0	0	0	0	0	0	0	0	0	0	0	0	0	0	0	0	0	0	0	0	0	0	0	0	0	0	0	0	0	0	0	0	0	0
P034	0	0.00847246	0	0	0	0	0	0	0	0	0	0.00124595	0	0.0211812	0.014453	0	0	0.00473461	0	0.00697732	0	0	0	0	0	0	0	0	0	0	0	0	0.0149514	0	0	0	0	0	0	0	0	0	0	0	0	0.00598056	0	0	0
P035	0	0	0	0.00356474	0	0	0	0	0	0	0	0	0	0.166535	0	0	0	0.00435691	0	0	0	0	0	0	0	0	0	0	0	0	0	0	0.0399323	0	0	0	0	0	0	0	0	0	0	0	0	0.00277258	0	0	0
P036	0	0	0	0.000987106	0.00345487	0	0	0	0	0	0	0	0	0.0302301	0.0350423	0	0	0	0	0	0	0	0	0	0	0	0	0	0	0	0	0	0.01129	0	0	0	0	0	0	0	0	0	0	0	0	0	0.00468875	0	0
P037	0	0.00166717	0	0	0.0119981	0	0	0	0	0	0.000191314	0	0	0.016453	0	0	0	0.00729728	0.00142119	0	0	0	0	0	0.000737927	0	0	0	0	0	0	0	0.0339446	0	0	0	0	0	0	0	0	0	0	0	0	8.19919e-05	0	0	0
P038	0	0	0	0	0.00175502	0	0	0	0	0	0	0	0	0.0397202	0	0.000103236	0	0	0	0	0	0	0	0	0	0	0	0	0	0	0	0	0	0	0.000180664	0	0	0	0	0	0	0	0	0	0	0.0236412	0	0	0.000361328
P039	0	0	0	0	0.163106	0	0	0	0	0	0	0	0	0.0771235	0	0	0	0	0	0	0	0	0	0	0	0	0	0	0	0	0	0	0	0	0	0	0	0	0	0	0	0	0	0	0	0	0	0	0
	Participant identifiers have been anonymized and replaced with sequential pseudonymized IDs (e.g., P001, P002). No identifying information is included.
	Values represent the relative abundance of each bacterial genre within each individual's microbiome
[truncated: 134 more columns]
